# Supplementary material for: Expression levels and associations of five long non-coding RNAs in gastric cancer and their clinical significance
Source: PubMed Central journal article supplement — Oncol Lett. 2020 Jan 16;19(3):2431–45. doi: 10.3892/ol.2020.11311 (PMC7039045; doi:10.3892/ol.2020.11311), 2020-01-16
Supplement: Supplementary_Data.pdf [file Supplementary_Data.pdf]

Table SI. Primer sequences used for reverse transcription-quantitative PCR target amplification and UCC siRNA transfection.

| S/N | Long non-coding RNA | Forward primer sequence     | Reverse primer sequence        |
|-----|---------------------|-----------------------------|--------------------------------|
| 1   | UCC                 | 5'-GAAAGCATTTTGAAGCCACTG-3' | 5'-GAAACTCACCAACCCAAACCTC-3'   |
| 2   | FOXP4-AS1           | 5'-GTGAGCTTCTGGGTTTCGACA-3' | 5'-ATTGAGGGTTAGGGCAGCAC-3'     |
| 3   | PTPGR-AS1           | 5'-AAGCCAAGCAGTCAGAAGCA-3'  | 5'-GAGCCCTGACAGCCTAATGA-3'     |
| 4   | ZXF2                | 5'-CACCCAGGTCAGAGAAAGCA-3'  | 5'-TGGAAGGGACACTAGAAGAAGAAT-3' |
| 5   | BLACAT2             | 5'-AGAGAGGAGGAGAAGCAA-3'    | 5'-TGTGAAGTGCAGGGAGGA-3'       |
| 6   | GAPDH               | 5'-ACCCACTCCTCCACCTTTGAC-3' | 5'-TGTTGCTGTAGCCAAATTCGTT-3'   |
| 7   | si-UCC #1           | 5'-CCUAGUGGAAUGGAGGUUUTT-3' | 5'-AAACCUCCAUUCCACUAGGTT-3'    |
| 8   | si-UCC #2           | 5'-GGAAGGGCCUUGAUGUATT-3'   | 5'-UACAUCAGAAGGCCCUUCCTT-3'    |
| 9   | si-UCC #3           | 5'-UCACAGAAAUGCUGUGUAUTT-3' | 5'-AUACACAGCAUUUCUGUGATT-3'    |

siRNA, short interfering RNA.
